# Supplementary material for: HPV shapes tumor transcriptome by globally modifying the pool of RNA binding protein-binding motif
Source: PubMed Central journal article supplement (PMC6520004; doi:10.18632/aging.101927), 2019-04-29
Supplement: aging-11-101927-s001.pdf [file aging-11-101927-s001.pdf]

## SUPPLEMENTARY TABLE

**Supplementary Table 1. The clinical information of patients included in the analysis.**

|                        |         |                |       | <b>HPV positive (n = 38)</b> |       | <b>HPV negative (n = 73)</b> |  |
|------------------------|---------|----------------|-------|------------------------------|-------|------------------------------|--|
| <b>Age</b>             |         | Median (range) |       | 56 (40-71)                   |       | 60 (19-83)                   |  |
| <b>Stage</b>           |         |                |       |                              |       |                              |  |
|                        | I       | 2              | 5.3%  | 4                            | 5.5%  |                              |  |
|                        | II      | 6              | 15.8% | 9                            | 12.3% |                              |  |
|                        | III     | 5              | 13.2% | 13                           | 17.8% |                              |  |
|                        | IV      | 25             | 65.8% | 46                           | 63.0% |                              |  |
|                        | Unknown | 0              | 0.0%  | 1                            | 1.4%  |                              |  |
| <b>Gender</b>          |         |                |       |                              |       |                              |  |
|                        | Male    | 35             | 92.1% | 56                           | 76.7% |                              |  |
|                        | Female  | 3              | 7.9%  | 17                           | 23.3% |                              |  |
| <b>Smoking history</b> |         |                |       |                              |       |                              |  |
|                        | Never   | 11             | 28.9% | 11                           | 15.1% |                              |  |
|                        | Former  | 11             | 28.9% | 31                           | 42.5% |                              |  |
|                        | Current | 15             | 39.5% | 30                           | 41.1% |                              |  |
|                        | Unknown | 1              | 2.6%  | 1                            | 1.4%  |                              |  |
| <b>Alcohol history</b> |         |                |       |                              |       |                              |  |
|                        | YES     | 29             | 76.3% | 54                           | 74.0% |                              |  |
|                        | NO      | 9              | 23.7% | 17                           | 23.3% |                              |  |
|                        | unknown | 0              | 0.0%  | 2                            | 2.7%  |                              |  |
